# Supplementary material
Source: PubMed Central journal article supplement (PMC5679824)
Supplement: supp_the2016-0498_onco12209-sup-0001-suppinfo1.pdf [file supp_the2016-0498_onco12209-sup-0001-suppinfo1.pdf]

Supplemental Tables for:  
Soft Tissue Sarcomas of the Extremities: Surgical Margins Can Be Close as Long as the Resected Tumor Has No Ink on It  
Kamran Harati et al.

**Table S1.** The association between negative surgical margin widths, tumor grading, histotype and size.

|                   | N   | Mean (mm) | Minimum-maximum (mm) | <i>p</i> *       |
|-------------------|-----|-----------|----------------------|------------------|
| <b>Tumor size</b> |     |           |                      |                  |
| ≤5cm              | 165 | 0.5       | 0.1-2.5              |                  |
| >5cm              | 363 | 0.3       | 0.0-4.0              | <0.001           |
| <b>Grading</b>    |     |           |                      |                  |
| G1                | 118 | 0.2       | 0.1-2.0              | G1 vs G2: <0.001 |
| G2                | 185 | 0.5       | 0.1-4.0              | G2 vs G3: 0.551  |
| G3                | 225 | 0.4       | 0.1-2.5              | G1 vs G3: <0.001 |
| <b>Entity</b>     |     |           |                      |                  |
| NOS               | 118 | 0.2       | 0.1-2.0              | G1 vs G2: <0.001 |
| Liposarcoma       | 185 | 0.5       | 0.1-4.0              | G2 vs G3: 0.551  |
| Leiomyosarcoma    | 225 | 0.4       | 0.1-2.5              | G1 vs G3: <0.001 |
| Myxofibrosarcoma  | 118 | 0.2       | 0.1-2.0              | G1 vs G2: <0.001 |
| Synovial sarcoma  | 185 | 0.5       | 0.1-4.0              | G2 vs G3: 0.551  |
| All               | 225 | 0.4       | 0.1-2.5              | G1 vs G3: <0.001 |

\* Mann-Whitney-U test

Supplemental Tables for:  
Soft Tissue Sarcomas of the Extremities: Surgical Margins Can Be Close as Long as the Resected Tumor Has No Ink on It  
Kamran Harati et al.

**Table S2.** The outcome of the patients according to AJCC (American Joint Committee on Cancer) staging

|      | AJCC | N   | events | 1 year rate        | 2 year rate        | 5 year rate        | p-Wert* |
|------|------|-----|--------|--------------------|--------------------|--------------------|---------|
| LRFS | IA   | 54  | 15     | 91.7 (79.4 - 96.8) | 89.6 (76.8 - 95.5) | 76.6 (60.6 - 86.8) |         |
|      | IB   | 93  | 18     | 96.5 (89.5 - 98.9) | 90.5 (81.9 - 95.1) | 81.6 (70.8 - 88.8) |         |
|      | IIA  | 169 | 49     | 86.9 (80.4 - 91.4) | 79.0 (71.5 - 84.8) | 69.3 (60.8 - 76.3) |         |
|      | IIB  | 140 | 55     | 88.9 (81.9 - 93.3) | 78.9 (70.4 - 85.3) | 54.3 (44.0 - 63.5) |         |
|      | III  | 187 | 55     | 81.8 (74.7 - 87.1) | 73.9 (65.7 - 80.3) | 55.8 (45.7 - 64.8) |         |
|      |      |     |        |                    |                    |                    |         |
| DSS  | IA   | 54  | 2      | 100 (-)            | 100 (-)            | 97.0 (80.4 - 99.6) |         |
|      | IB   | 93  | 2      | 100 (-)            | 100 (-)            | 97.4 (89.9 - 99.3) |         |
|      | IIA  | 169 | 23     | 99.4 (95.5 - 99.9) | 95.8 (90.8 - 98.1) | 91.2 (84.6 - 95.1) |         |
|      | IIB  | 140 | 17     | 99.2 (94.7 - 99.9) | 97.4 (92.2 - 99.2) | 86.4 (77.2 - 92.1) |         |
|      | III  | 187 | 44     | 92.6 (87.4 - 95.8) | 82.0 (74.6 - 87.4) | 65.8 (55.9 - 74.0) |         |
|      |      |     |        |                    |                    |                    |         |
| MFS  | IA   | 54  | 1      | 100 (-)            | 100 (-)            | 97.4 (82.8 - 99.6) |         |
|      | IB   | 93  | 4      | 97.7 (91.3 - 99.4) | 96.6 (89.7 - 98.9) | 95.3 (87.8 - 98.2) |         |
|      | IIA  | 169 | 29     | 94.2 (89.1 - 96.9) | 89.9 (83.8 - 93.8) | 82.9 (75.2 - 88.4) |         |
|      | IIB  | 140 | 33     | 91.1 (84.9 - 94.9) | 85.9 (78.4 - 90.9) | 76.6 (67.5 - 83.4) |         |
|      | III  | 187 | 63     | 79.9 (72.9 - 85.3) | 71.1 (63.1 - 77.7) | 56.2 (46.5 - 64.8) |         |
|      |      |     |        |                    |                    |                    |         |

\*log-rank test
